# Supplementary material for: Detection of Recombinant Rousettus Bat Coronavirus GCCDC1 in Lesser Dawn Bats (Eonycteris spelaea) in Singapore
Source: Viruses. 2020 May 14;12(5):539. doi: 10.3390/v12050539 (PMC7291116; doi:10.3390/v12050539)
Supplement: Supplementary file 1 [file viruses-12-00539-s001.pdf]

**Supplemental Table 1.** Number of positive swabs detected at each time point, parsed by swab type. A swab was considered to be positive if more than 10 reads mapped to more than 100 bases of the scaffolded reference genome with greater than 95% identity.

| Date           | Body swab | Head swab | Oral swab | Rectal swab |
|----------------|-----------|-----------|-----------|-------------|
| April 2016     | 2         | 3         | 3         | 3           |
| July 2016      |           |           | 1         | 3           |
| October 2016   | 18        | 18        | 6         | 13          |
| January 2017   | 1         |           |           |             |
| September 2017 |           |           | 1         |             |
